# Supplementary material for: Psychiatric comorbidities in children with conduct disorder: a descriptive analysis of real-world data
Source: PubMed Central journal article supplement — Gen Psychiatr. 2024 Apr 18;37(2):e101501. doi: 10.1136/gpsych-2023-101501 (PMC11029182; doi:10.1136/gpsych-2023-101501), 2024-04-18
Supplement: gpsych-2023-101501supp001.pdf [file gpsych-2023-101501supp001.pdf]

### Supplementary eFigure – overview of the study design

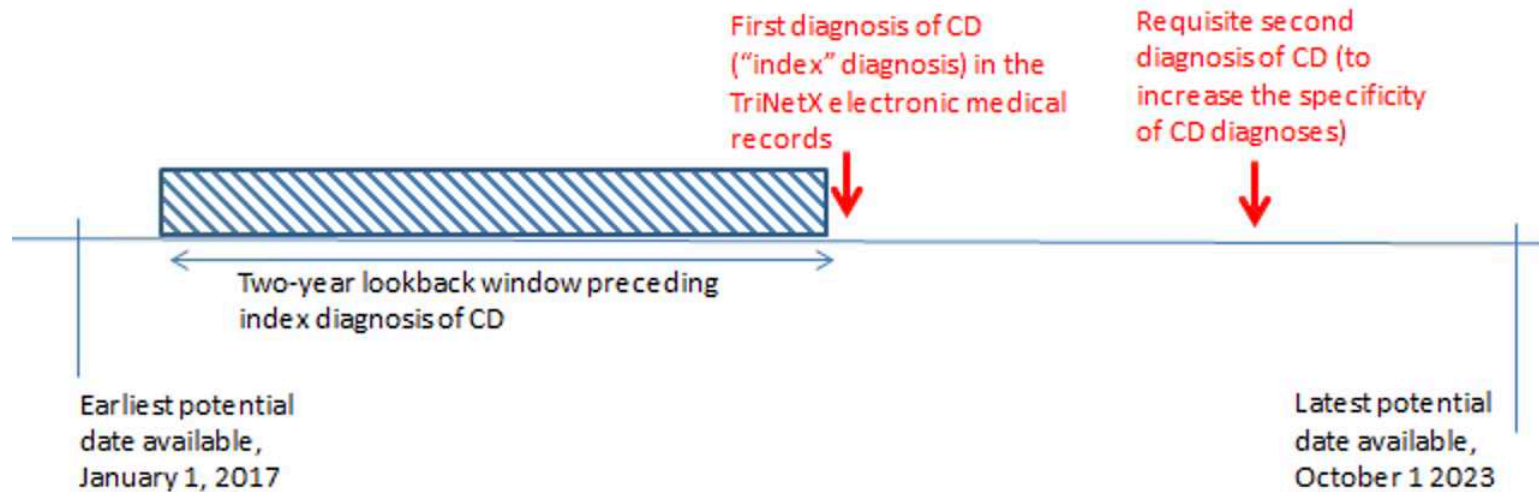

 The two-year lookback period preceding the index diagnosis of CD was used to ascertain demographics, co-occurring disorders (i.e., ADHD), and medication receipt (i.e., stimulants) in the TriNetX electronic medical records.

Abbreviations: ADHD (attention deficit hyperactivity disorder), CD (conduct disorder)
