# Supplementary material for: Psychiatric comorbidities in children with conduct disorder: a descriptive analysis of real-world data
Source: PubMed Central journal article supplement — Gen Psychiatr. 2024 Apr 18;37(2):e101501. doi: 10.1136/gpsych-2023-101501 (PMC11029182; doi:10.1136/gpsych-2023-101501), 2024-04-18
Supplement: gpsych-2023-101501supp002.pdf [file gpsych-2023-101501supp002.pdf]

**Supplementary eTable – Coding of variables in the TriNetX databases**

| <b>Variable</b>                                           | <b>Coding in the TriNetX Databases</b>         |
|-----------------------------------------------------------|------------------------------------------------|
| Conduct disorder                                          | ICD10: F91                                     |
| Attention-deficit hyperactivity disorder                  | ICD10: F90                                     |
| Generalized anxiety disorder                              | ICD10: F41.1                                   |
| Post-traumatic stress disorder                            | ICD10: F43.1                                   |
| Adjustment disorder                                       | ICD10: F43.2                                   |
| Obsessive compulsive disorder                             | ICD10: F42                                     |
| Mood (affective) disorder (depressive, bipolar disorders) | ICD10: F30-F39                                 |
| Schizophrenia spectrum disorders                          | ICD10: F20-F29                                 |
| Personality disorders                                     | ICD10: F60                                     |
| Impulse control disorders                                 | ICD10: F63                                     |
| Autism spectrum disorders                                 | ICD10: F84                                     |
| Intellectual disabilities                                 | ICD10: F70-F79                                 |
| Substance use disorders                                   | ICD10: F10-F19 (F12 for cannabis use disorder) |
| Any antipsychotics                                        | ATC: N05A                                      |
|                                                           | Risperidone Rxnorm 35636                       |
|                                                           | Aripiprazole Rxnorm 89013                      |
|                                                           | Quetiapine Rxnorm 51272                        |
|                                                           | Olanzapine Rxnorm 61381                        |
|                                                           | Haloperidol Rxnorm 5093                        |
|                                                           | Ziprasidone Rxnorm 115698                      |
|                                                           | Lurasidone Rxnorm 1040028                      |
| Any selective serotonin reuptake inhibitors               | ATC: N06AB                                     |
| Lithium                                                   | ATC: N05AN                                     |
| Lamotrigine                                               | Rxnorm 28439                                   |
| Carbamazepine                                             | Rxnorm 2002                                    |
| Valproate                                                 | Rxnorm 40254                                   |
| All stimulants                                            |                                                |
|                                                           | Amphetamine salts Rxnorm: 725                  |
|                                                           | Dextroamphetamine Rxnorm: 3288                 |
|                                                           | Methylphenidate Rxnorm: 6901                   |
|                                                           | Dexmethylphenidate Rxnorm: 352372              |
|                                                           | Lisdexamfetamine Rxnorm: 700810                |

ATC: Anatomical therapeutic chemical; Rxnorm: Normalized naming system for generic and branded drugs produced by the National Library of Medicine
